# Supplementary material
Source: HighWire-hosted journal article supplement (https://openres.ersjournals.com/content/7/3/00068-2021)
Supplement: inline-supplementary-material-1 [file inline-supplementary-material-1.pdf]

**Supplemental Figure 1.** Distributions of C-reactive protein and transferrin by Anaemia, Normal Haemoglobin, and Polycythaemia groups

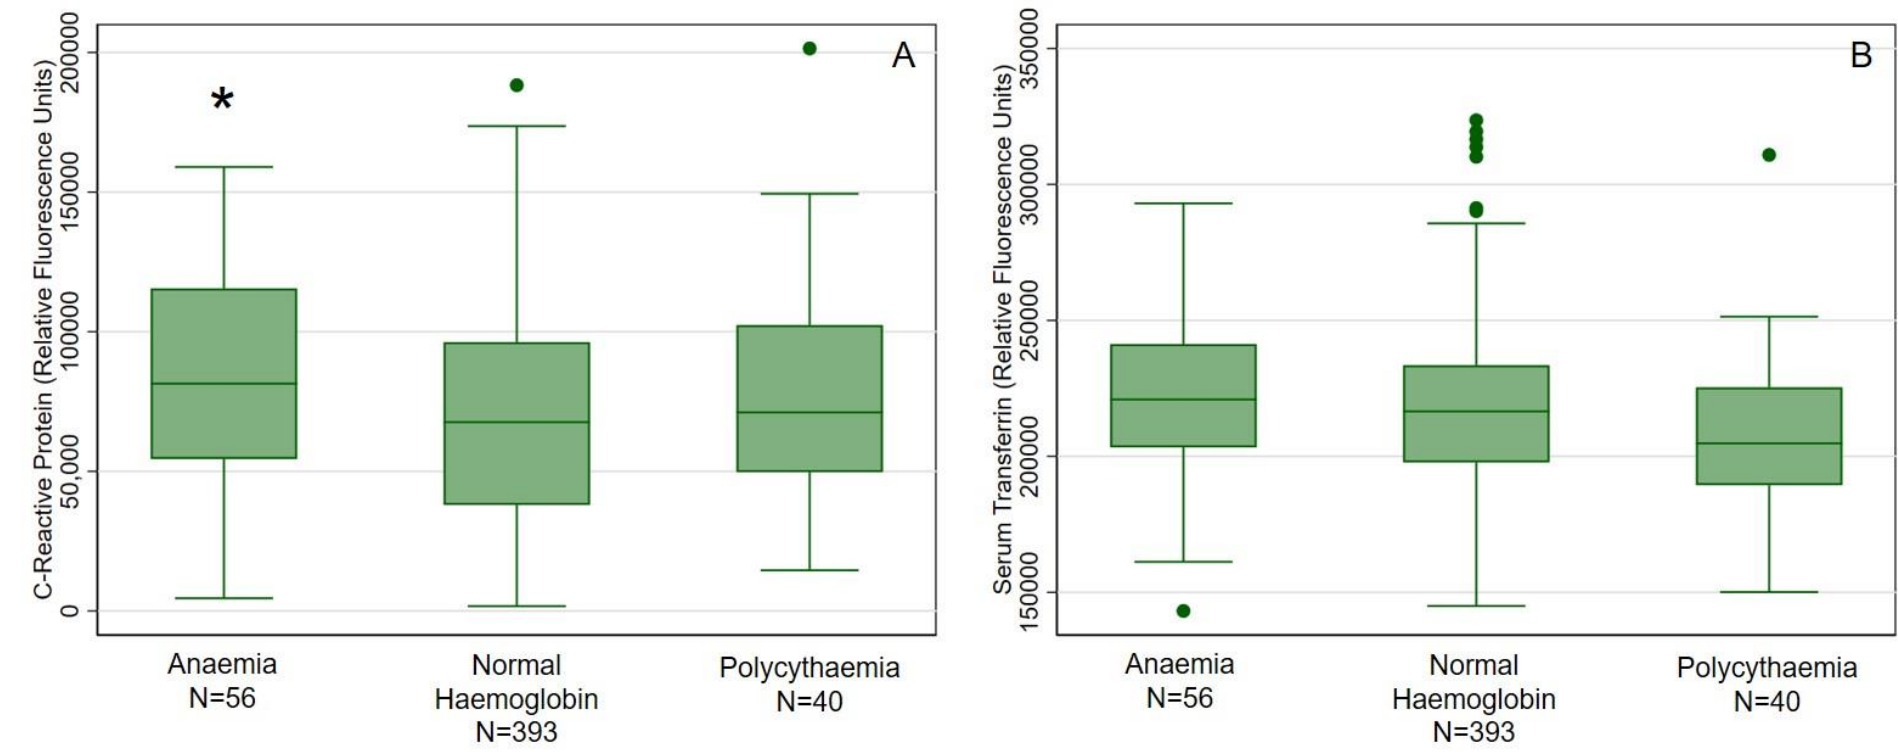

Proteomic analyses using SOMAScan assay performed in a subset of individuals. Panel A describing distributions of C-reactive protein and Panel B with distributions of Serum Transferrin. \* represents  $p < 0.05$  for comparison to Normal Haemoglobin group.

**Supplemental Figure 2.** Increasing Prevalence of Anaemia by COPD Disease Severity

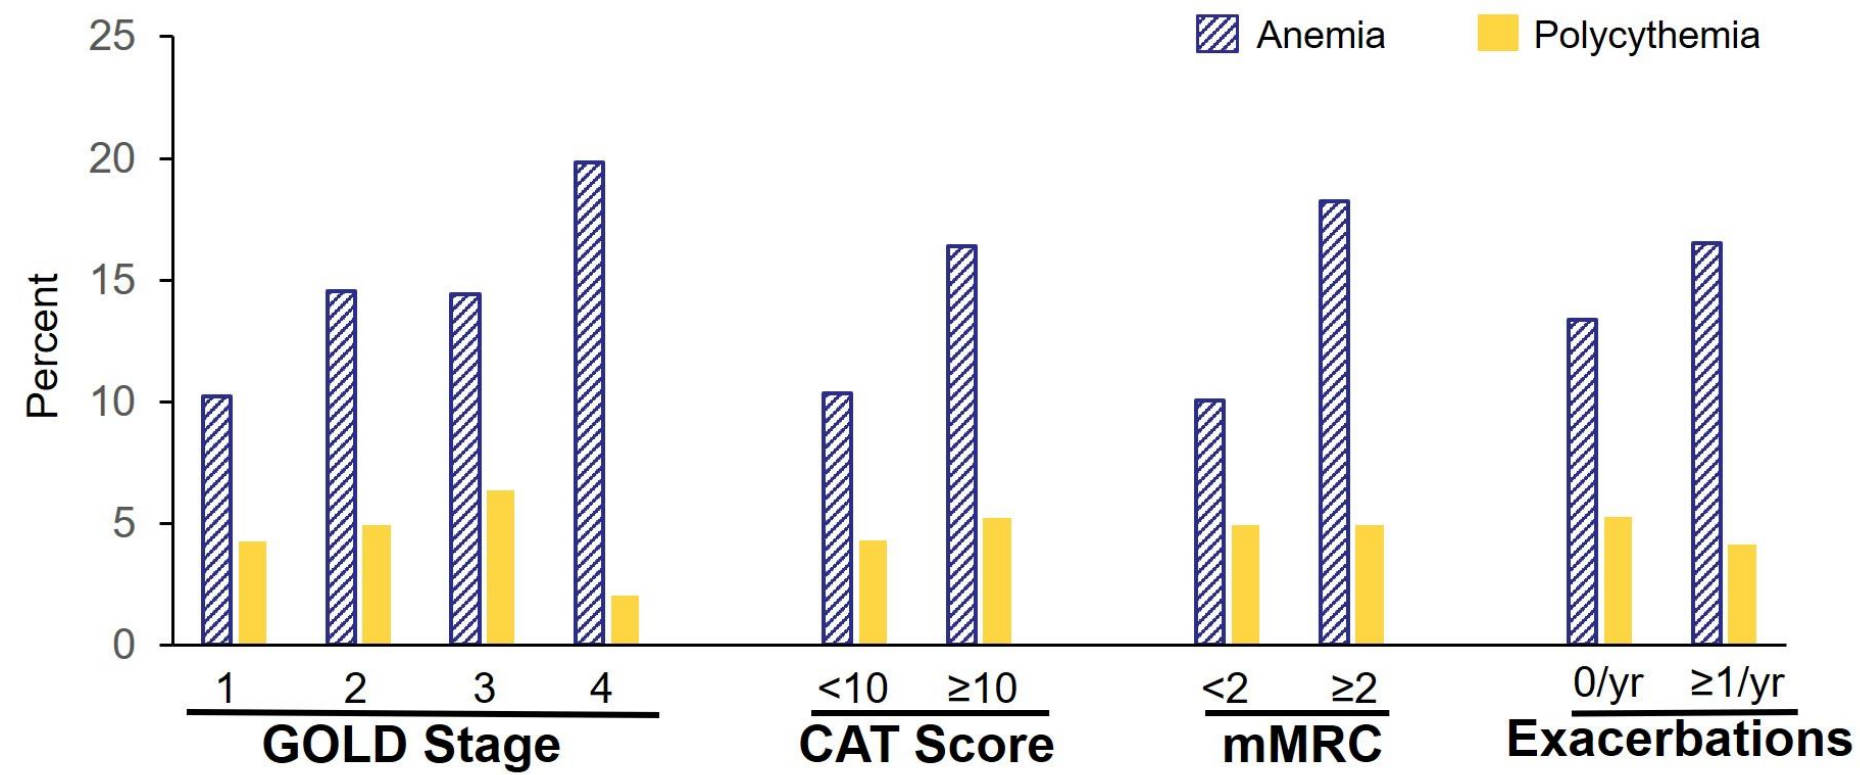

Blue dashed bars represent prevalence of anaemia, while solid filled yellow bars represent prevalence of polycythaemia. *GOLD Stage = spirometry stages established by Global Obstructive Lung Disease Committee, CAT = COPD Assessment Test score, mMRC = modified medical research council score*

**Supplemental Figure 3.** Moderate and Severe Exacerbations across Haemoglobin range

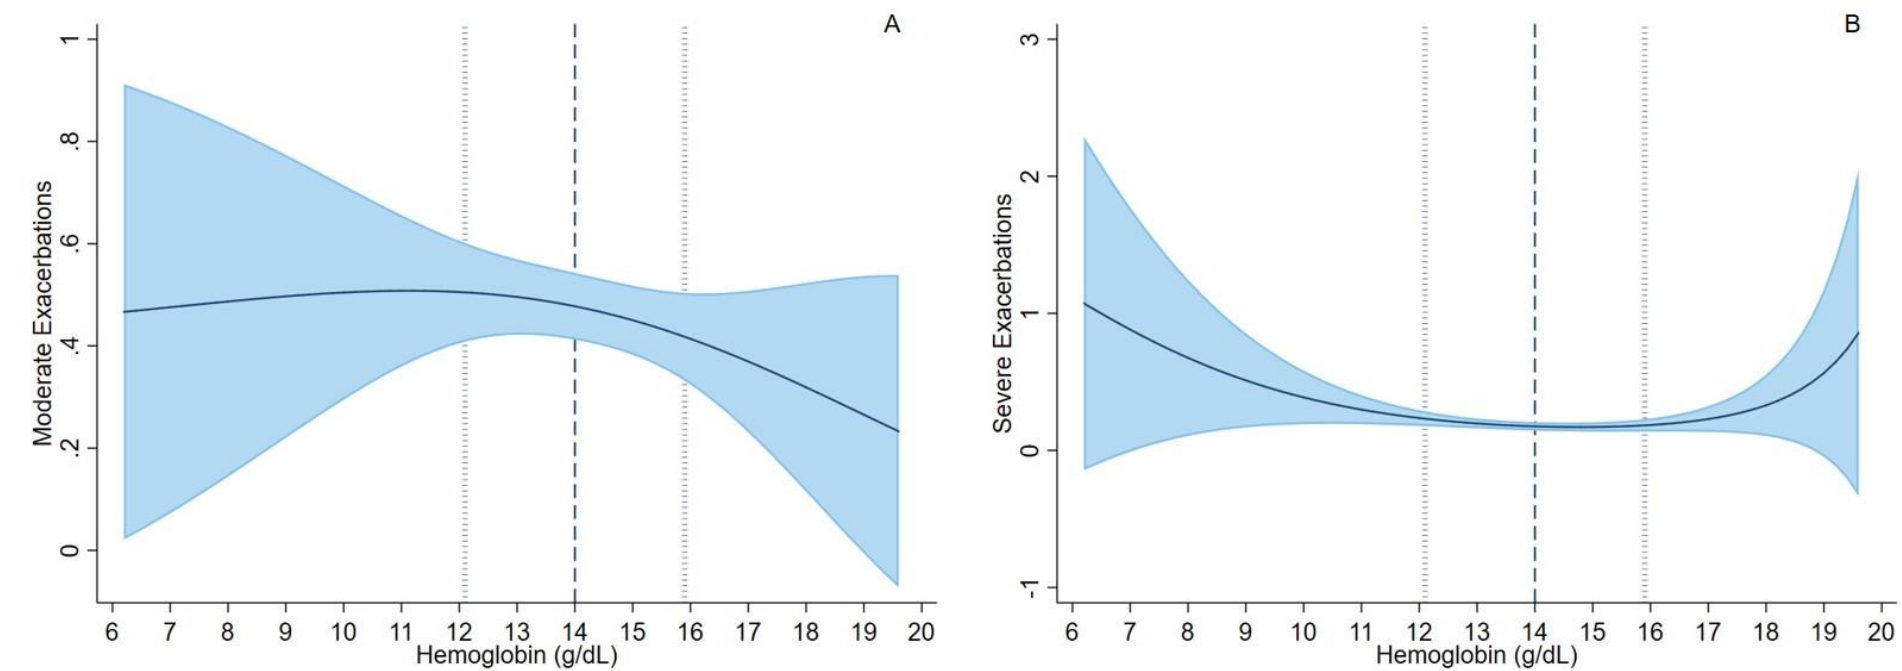

Models adjusted for age, sex, ethnicity, education, pack-years smoked, smoking status, BMI, CHF, HTN, DM, CKD, FEV1 % predicted, DLCO % predicted, and percent emphysema.

**Supplemental Table 1.** Micro-, Normo-, and Macrocytosis Percentages by Anaemia, Normal Haemoglobin, and Polycythaemia groups

|              | <b>Anaemia<br/>(N=366)</b> | <b>Normal<br/>Haemoglobin<br/>(N=2048)</b> | <b>Polycythaemia<br/>(N=125)</b> |
|--------------|----------------------------|--------------------------------------------|----------------------------------|
| Microcytosis | 42 (11)                    | 35 (2)                                     | 0 (0)                            |
| Normocytosis | 306 (84)                   | 1905 (93)                                  | 113 (90)                         |
| Macrocytosis | 18 (5)                     | 108 (5)                                    | 12 (10)                          |

Cells are N (% of column). 77 (3%) of participants were microcytic, 2324 (92%) normocytic, and 138 (5%) macrocytic.  $\chi^2 = 108.9$ ,  $p < 0.001$ . Microcytosis was defined as a mean corpuscular volume  $< 80$  fL, normocytosis as 80-100 fL, and macrocytosis as  $> 100$  fL.

**Supplemental Table 2.** Sensitivity analysis of associations between Anaemia or Polycythaemia with clinical outcomes among only normocytic individuals

|                         | <b>Anaemia<br/>(N=188)</b> |         | <b>Polycythaemia<br/>(N=85)</b> |         |
|-------------------------|----------------------------|---------|---------------------------------|---------|
|                         | $\beta$ (95% CI)           | p-value | $\beta$ (95% CI)                | p-value |
| CAT Score               | 1.04 (-0.07 – 2.15)        | 0.068   | -0.48 (-2.05 – 1.1)             | 0.56    |
| mMRC Dyspnea Score      | 0.22 (0.04 – 0.39)         | 0.015   | 0.09 (-0.15 – 0.35)             | 0.45    |
| SGRQ Score              | 3.17 (0.60 – 5.73)         | 0.016   | 0.53 (-3.12 – 4.17)             | 0.78    |
| SF-36 General           | -2.0 (-3.48 – -0.54)       | 0.007   | 1.18 (-0.91 – 3.27)             | 0.27    |
| SF-36 Physical Function | -2.44 (-3.89 – -1.0)       | 0.001   | 0.33 (-1.74 – 2.40)             | 0.76    |
| SF-36 Mental Health     | -1.41 (-3.0 – 0.19)        | 0.08    | -0.16 (-2.4 – 2.1)              | 0.89    |
| 6MWD (m)                | -50.1 (-66 – -34)          | <0.001  | -3.8 (-26 – 18)                 | 0.74    |
|                         | RR (95% CI)                | p-value | RR (95% CI)                     | p-value |
| Moderate Exacerbations  | 0.98 (0.67 – 1.43)         | 0.91    | 0.65 (0.36 – 1.19)              | 0.16    |
| Severe Exacerbations    | 1.46 (0.94 – 2.27)         | 0.09    | 1.34 (0.68 – 2.7)               | 0.39    |

Models adjusted for age, sex, ethnicity, education, BMI, pack-years, smoking status, CHF, HTN, DM, CKD, % emphysema, FEV<sub>1</sub> % predicted, and DLCO % predicted. Total N=1735 for all models. Coefficients and p-values are in comparison to normal haemoglobin.  $\beta$  coefficient units are points for CAT, mMRC, SGRQ, and SF-36 scores, and meters for 6MWD.

**Supplemental Table 3.** Sensitivity analysis of associations between Anaemia and Polycythaemia with clinical outcomes, including oxygen use and resting oxygen saturation as confounders

|                         | Anaemia              |         | Polycythaemia       |         |
|-------------------------|----------------------|---------|---------------------|---------|
|                         | $\beta$ (95% CI)     | p-value | $\beta$ (95% CI)    | p-value |
| CAT Score               | 1.29 (0.29 – 2.29)   | 0.01    | -0.39 (-1.9 – 1.1)  | 0.60    |
| mMRC Dyspnea Score      | 0.26 (0.09 – 0.41)   | 0.001   | 0.06 (-0.18 – 0.29) | 0.63    |
| SGRQ Score              | 3.76 (1.47 – 6.04)   | 0.001   | 0.32 (-3.07 – 3.71) | 0.85    |
| SF-36 General           | -1.9 (-3.21 – -0.59) | 0.004   | 1.29 (-0.65 – 3.25) | 0.19    |
| SF-36 Physical Function | -2.65 (-3.9 – -1.3)  | <0.001  | 0.61 (-1.33 – 2.56) | 0.54    |
| SF-36 Mental Health     | -1.29 (-2.7 – 0.16)  | 0.08    | -0.46 (-2.6 – 1.7)  | 0.67    |
| 6MWD (m)                | -49.6 (-64 – -35)    | <0.001  | 2.1 (-18.8 – 23.1)  | 0.84    |
|                         | RR (95% CI)          | p-value | RR (95% CI)         | p-value |
| Moderate Exacerbations  | 1.03 (0.74 – 1.45)   | 0.85    | 0.74 (0.42 – 1.29)  | 0.29    |
| Severe Exacerbations    | 1.46 (0.99 – 2.16)   | 0.05    | 1.29 (0.68 – 2.44)  | 0.44    |

Models adjusted for age, sex, ethnicity, education, BMI, pack-years, smoking status, resting oxygen saturation, long term oxygen use, CHF, HTN, DM, CKD, % emphysema, FEV<sub>1</sub> % predicted, and DLCO % predicted. Coefficients and p-values are in comparison to normal haemoglobin.  $\beta$  coefficient units are points for CAT, mMRC, SGRQ, and SF-36 scores, and meters for 6MWD.

**Supplemental Table 4.** Haemoglobin treated as a continuous variable is associated with COPD morbidity

|                                | <b><u>Fractional Polynomial Powers<br/>for Haemoglobin Terms</u></b> | <b><u>p-value</u></b> |
|--------------------------------|----------------------------------------------------------------------|-----------------------|
| <b>CAT Score</b>               | <b>0.5, 1</b>                                                        | <b>0.031</b>          |
| <b>mMRC Dyspnea Score</b>      | <b>1, 3</b>                                                          | <b>&lt;0.001</b>      |
| <b>SGRQ Score</b>              | <b>-0.5, 3</b>                                                       | <b>&lt;0.001</b>      |
| SF-36 General                  | 1, 1                                                                 | 0.05                  |
| <b>SF-36 Physical Function</b> | <b>0.5, 3</b>                                                        | <b>&lt;0.001</b>      |
| SF-36 Mental Health            | -1, 3                                                                | 0.018                 |
| <b>6MWD (m)</b>                | <b>3, 3</b>                                                          | <b>&lt;0.001</b>      |
|                                |                                                                      |                       |
| Moderate Exacerbations         | 3, 3                                                                 | 0.664                 |
| <b>Severe Exacerbations</b>    | <b>3, 3</b>                                                          | <b>0.003</b>          |

Fractional polynomial models (m=2) were used for all outcomes. Models were adjusted for age, sex, ethnicity, education, BMI, pack-years, smoking status, CHF, HTN, DM, CKD, % emphysema, FEV<sub>1</sub> % predicted, and DLCO % predicted all as linear terms. Exacerbation models were negative binomial regressions for rate of exacerbations. Fractional polynomial powers for haemoglobin terms, and the linear combination p-value for a non-zero haemoglobin coefficient are displayed in the above table. Bolded rows represent models where t-tests for all haemoglobin terms were significant at p<0.05.
